# Supplementary material
Source: publisher site journal article supplement (http://static.cambridge.org/content/id/urn:cambridge.org:id:article:S1832427419000227/resource/name/S1832427419000227supp001.xlsx)
Supplement: Supplementary file 1 [file S1832427419000227supp001.xlsx]

## Sheet: Supplementary Table 1
Supplementary Table 1 - Disorders and ICD-10 codes included in diagnostic categories
Diagnostic Group	Diagnosis	ICD-10 codes
Insomnia	Non-organic Insomnia	F51.0x
	Adjustment Insomnia	F51.02
	Other insomnia not due to a substance or known physiological condition	F51.09
	Primary insomnia	F51.01
	Paradoxical insomnia	F51.03
	Psychophysiological insomnia	F51.04
	Insomnia not otherwise specified	G47.00
	Insomnia due to medical condition	G47.01
	Other Insomnia	G47.09
Hypersomnia	Non-organic hypersomnia	F51.1x
	Primary Hypersomnia	F51.11
	Insufficient sleep syndrome	F51.12
	Other hypersomnia not due to a substance or known physiological condition	F51.19
	Hypersomnia unspecified	G47.10
	Idiopathic hypersomnia with long sleep time	G47.11
	Idiopathic hypersomnia without long sleep time	G47.12
	Recurrent hypersomnia	G47.13
	hypersomnia due to medical condition	G47.14
	Other hypersomnia	G47.19
Circadian Rhythm Sleep Disorders	Non-organic circadian rhythm disorder	F51.2x
	Circadian Rhythm Sleep Disorders (NOS)	G47.20
	Delayed Sleep Phase Type	G47.21
	Advanced Sleep Phase Type	G47.22
	Irregular Sleep-Wake Type	G47.23
	Free-Running Type	G47.24
	Shift Work Type (Shift Work Disorder)	G47.26
Parasomnias	Non-Organic Parasomnias	F51.3-5
	Sleepwalking	F51.3
	Night Terrors	F51.4
	Nightmare Disorder	F51.5
	Organic parasomnias	G47.5x
	Confusional Arousals	G47.51
	REM Sleep Behavior Disorder	G47.52
	Recurrent Isolated Sleep Paralysis	G47.53
	Organic parasomnia in conditions classified elsewhere	G47.54
	Other parasomnia	G47.59
Sleep-related Movement Disorders		G47.6x
	Periodic Limb Movement Disorder	G47.61
	Sleep Related Leg Cramps	G47.62
	Sleep Related Bruxism	G47.63
	Other sleep related movement disorder	G47.69
Narcolepsy
	Narcolepsy With Cataplexy	G47.411
	Narcolepsy Without Cataplexy	G47.419
Sleep Related Breathing Disorders		G47.3x
	Obstructive Sleep Apnea	G47.33
	Sleep Related Nonobstructive Alveolar Hypoventilation	G47.34
	Sleep Related Hypoventilation/Hypoxemia	G47.36
	Primary Central Sleep Apnea	G47.31
	Central Sleep Apnea/Complex Sleep Apnea	G47.37
	Other Sleep Apnea	G47.39
	Unspecified Sleep Apnea	G47.30

## Sheet: Supplementary Table 2
Supplementary Table 2 Sample Demographics
		Cases (percentage)	Controls (percentage	Odds Ratio for depression compared to reference
Sex	Male	24478 (37.3%)	489560	1
	Female	41271 (62.7%)	825420
Age	15-19	0.1175	-
	20-29	0.2916	-
	30-39	0.2846	-
	40-49	0.2213	-
	50-60	0.085	-
Employment Level in year prior	Employed	38283 (58.23%)	1022983 (77.89%)	1
	Unemployed (seeking work)	3284 (4.99%)	38059 (2.90%)	2.31 (2.22-2.39)
	Outside workforce (on sick/parental leave, military service etc)	6566 (9.99%)	39857 (3.03%)	4.48 (4.35 - 4.61)
	Student	4757 (7.24%)	86902 (6.62%)	1.52 (1.46-1.57)
	Others (including children, senior citizens, social benefits recipients)	12848 (19.54%)	125611 (9.56%)	3.14 (3.07-3.21)
	Missing	11 (0.02%)	1568 (0.12%)	0.19 (0.11-0.34)
Income in quintiles (normalised by gender, year, and birth year)	Lowest Quintile	17577 (26.73%)	201067 (15.29%)	3.20 (3.10-3.29)
	Second	11941 (18.16%)	204394 (15.54%)	2.13 (2.06-2.20)
	Third	9123 (13.88%)	208313 (15.84%)	1.59 (1.54 - 1.64)
	Fourth	7170 (10.91%)	208526 (15.86%)	1.25 (1.21 - 1.30)
	Highest Quintile	5796 (8.82%)	210656 (16.02%)	1
	Missing	14142 (21.51%)	282024 (21.45%)	1.83 (1.77 - 1.88)
Highest level of education	Primary School	29572 (44.98%)	438284 (34.51%)	1
	High School/Vocational Training	23749 (36.12%)	546599 (43.04%)	0.54 (0.53-0.55)
	Short Education	1527 (2.32%)	47296 (3.72%)	0.39 (0.37-0.41)
	Medium Education	6594 (10.03%)	168685 (13.28%)	0.47 (0.45-0.48)
	Long Education (Graduate Degree)	1736 (2.64%)	69033 (5.44%)	0.29 (0.28-0.31)
	Missing	2571 (3.91%)	45083 (3.43%)	0.97 (0.92 - 1.04)
Family Type	Married/Registered Partnership/Cohabiting Couple	28280 (43.01%)	693916 (52.77%)	1
	Single (including children not living with parents)	26102 (39.70%)	363133 (27.62%)	1.78 (1.75 - 1.81)
	Children living with parents	11130 (16.93%)	252382 (19.19%)	0.84 (0.80-0.87)
	Missing	237 (0.36%)	5549 (0.42%)	1.04 (0.91 - 1.19)
Urbanicity	Rural	8546 (13.00%)	184978 (14.07%)	1
	Regional City	6679 (10.16%)	164554 (12.51%)	0.88 (0.85-0.91)
	Suburb of large city	8697 (13.23%)	176547 (13.43%)	1.07 (1.04 - 1.10)
	Large City	20201 (30.72%)	367608 (27.96%)	1.19 (1.16-1.22)
	Capital City	21208 (32.26%)	417994 (31.79%)	1.10 (1.07-1.13)
	Unknown	418 (0.64%)	3298 (0.25%)	2.75 (2.48-3.06)

## Sheet: Supplementary Table 3
Supplementary Table 3. Risk of incident depression by sleep disorder by sex
		Females									Males
		Incidence Rate Ratio	95% CI	95% CI	p-value	Adjusted IRR	95% CI	95% CI	p-value		Incidence Rate Ratio	95% CI	95% CI	p-value	Adjusted IRR	95% CI	95% CI	p-value
Insomnia	Inorganic	6.06	3.47	10.59	*	5.68	3.17	10.19	*		8.16	4.05	16.44	*	5.97	2.86	12.46	*
	Organic	2.99	1.42	6.28	*	2.69	1.26	5.73	0.01		6.14	3.02	12.49	*	5.29	2.49	11.23	*
	All	4.44	2.83	6.98	*	4.04	2.53	6.44	*		7.29	4.42	12.03	*	5.83	3.44	9.89	*
Hypersomnia	Organic	3.09	2.06	4.83	*	2.83	1.87	4.28	*		2.54	1.69	3.82	*	2.41	1.59	3.66	*
	All	3.04	2.06	4.49	*	2.73	1.84	4.07	*		2.46	1.65	3.67	*	2.34	1.56	3.53	*
Circadian Rhythm Disorders	Inorganic	11.48	3.36	39.18	*	N/A	N/A	N/A	N/A		4.04	0.89	18.35	0.07	1.38	0.29	6.55	0.68
Parasomnia	Inorganic	3.01	1.55	5.85	0.001	2.74	1.39	5.4	0.004		2.7	1.35	5.4	0.005	2.75	1.36	5.59	0.005
	All	2.7	1.44	5.06	0.002	2.52	1.33	4.79	0.005		2.91	1.55	5.47	0.0009	2.87	1.5	5.47	0.001
Other Inorganic sleep disorders		5.95	2.71	13.08	*	3.83	1.7	8.65	0.001		13.42	6.22	28.96	*	N/A	N/A	N/A	N/A
All inorganic sleep disorders		4.55	3.22	6.44	*	3.86	2.7	5.53	*		5.11	3.51	7.45	*	4.41	2.97	6.54	*
Narcolepsy		1.67	0.93	2.99	0.088	1.27	0.7	2.31	0.44		2.93	1.39	6.13	0.005	2.04	0.95	4.42	0.07
Sleep-disordered breathing		2.56	2.12	3.11	*	1.98	1.63	2.41	*		2.28	2.03	2.58	*	2.13	1.88	2.41	*
Obstructive Sleep Apnoea		2.98	1.42	6.25	*	2.37	1.11	5.06	0.03		3.9	2.74	5.55	*	4.05	2.81	5.83	*
Sleep Movement Disorder		4.39	2.99	6.44	*	3.97	2.68	5.89	*		1.97	1.16	3.35	0.01	1.97	1.14	3.38	0.014
Any organic sleep disorder		2.71	2.33	3.16	*	2.19	1.87	2.56	*		2.36	2.11	2.63	*	2.19	1.95	2.45	*
Any sleep disorder		2.94	2.55	3.38	*	2.37	2.06	2.74	*		2.47	2.22	2.75	*	2.28	2.04	2.55	*
